# Supplementary material for: Exploring the Mechanism of Danshen against Myelofibrosis by Network Pharmacology and Molecular Docking
Source: Evid Based Complement Alternat Med. 2018 Dec 5;2018:8363295. doi: 10.1155/2018/8363295 (PMC6304517; doi:10.1155/2018/8363295)
Supplement: Supplementary Materials — Supplementary Table 1: the information of compositive compounds of Danshen. Supplementary Table 2: prediction of putative targets for compositive compounds Danshen. Supplementary Table 3: overlap of significantly targets in myelofibrosis. Supplementary Table 4: the results of topology analysis. Supplementary Table 5: re-fishing targets based on Closeness and Betweenness. Supplementary Table 6: the results of KEGG enrichment analysis. Supplementary Table 7: detailed information on molecular docking of compounds. [file 8363295.f1.zip]

Archive with 7 entries (7 files):
- Supplementary Table S1-The information of compositive compounds of Danshen.xlsx
- Supplementary Table S2-Prediction of putative targets for compositive compounds Danshen.xlsx
- Supplementary Table S3-Overlap of significantly targets in Myelofibrosis.xlsx
- Supplementary Table S4-The results of topology analysis.xlsx
- Supplementary Table S5-Re-fishing targets based on Closeness and Betweenness(1).xlsx
- Supplementary Table S6-The results of KEGG enrichment analysis.xlsx
- Supplementary Table S7-Detailed information on molecular docking of compounds.xlsx
