# Supplementary material for: Exploring the Mechanism of Danshen against Myelofibrosis by Network Pharmacology and Molecular Docking
Source: Evid Based Complement Alternat Med. 2018 Dec 5;2018:8363295. doi: 10.1155/2018/8363295 (PMC6304517; doi:10.1155/2018/8363295)
Supplement: Supplementary Materials — Supplementary Table 1: the information of compositive compounds of Danshen. Supplementary Table 2: prediction of putative targets for compositive compounds Danshen. Supplementary Table 3: overlap of significantly targets in myelofibrosis. Supplementary Table 4: the results of topology analysis. Supplementary Table 5: re-fishing targets based on Closeness and Betweenness. Supplementary Table 6: the results of KEGG enrichment analysis. Supplementary Table 7: detailed information on molecular docking of compounds. [file 8363295.f1.zip › Supplementary Table S1-The information of compositive compounds of Danshen.xlsx]

## Sheet: Sheet1
Supplementary Table S1:The information of key compositive compounds of Danshen
Mol ID	Molecule Name	OB (%)	DL
MOL000569	digallate	61.85	0.26
MOL007050	2-(4-hydroxy-3-methoxyphenyl)-5-(3-hydroxypropyl)-7-methoxy-3-benzofurancarboxaldehyde	62.78	0.4
MOL007058	formyltanshinone	73.44	0.42
MOL007064	przewalskin b	110.32	0.44
MOL007068	Przewaquinone B	62.24	0.41
MOL007069	przewaquinone c	55.74	0.4
MOL007079	tanshinaldehyde	52.47	0.45
MOL007081	Danshenol B	57.95	0.56
MOL007082	Danshenol A	56.97	0.52
MOL007088	cryptotanshinone	52.34	0.4
MOL007094	danshenspiroketallactone	50.43	0.31
MOL007105	epidanshenspiroketallactone	68.27	0.31
MOL007108	isocryptotanshi-none	54.98	0.39
MOL007120	miltionone Ⅱ	71.03	0.44
MOL007125	neocryptotanshinone	52.49	0.32
MOL007130	prolithospermic acid	64.37	0.31
MOL007132	(2R)-3-(3,4-dihydroxyphenyl)-2-[(Z)-3-(3,4-dihydroxyphenyl)acryloyl]oxy-propionic acid	109.38	0.35
MOL007140	(Z)-3-[2-[(E)-2-(3,4-dihydroxyphenyl)vinyl]-3,4-dihydroxy-phenyl]acrylic acid	88.54	0.26
MOL007150	Tanshindiol A	75.39	0.46
MOL007155	Tanshinone IIb	65.26	0.45
