# Supplementary material for: Exploring the Mechanism of Danshen against Myelofibrosis by Network Pharmacology and Molecular Docking
Source: Evid Based Complement Alternat Med. 2018 Dec 5;2018:8363295. doi: 10.1155/2018/8363295 (PMC6304517; doi:10.1155/2018/8363295)
Supplement: Supplementary Materials — Supplementary Table 1: the information of compositive compounds of Danshen. Supplementary Table 2: prediction of putative targets for compositive compounds Danshen. Supplementary Table 3: overlap of significantly targets in myelofibrosis. Supplementary Table 4: the results of topology analysis. Supplementary Table 5: re-fishing targets based on Closeness and Betweenness. Supplementary Table 6: the results of KEGG enrichment analysis. Supplementary Table 7: detailed information on molecular docking of compounds. [file 8363295.f1.zip › Supplementary Table S2-Prediction of putative targets for compositive compounds Danshen.xlsx]

## Sheet: Sheet1
Supplementary Table S2:Prediction of putative targets for compositive compounds Danshen
Mol ID	target
MOL000569	PTGS2
MOL000569	HSP90AB1
MOL000569	AKR1B1
MOL000569	POLB
MOL000569	POLA1
MOL000569	CA12
MOL000569	CA1
MOL000569	CA2
MOL000569	CA3
MOL000569	CA5A
MOL000569	CA7
MOL000569	CA9
MOL000569	CA14
MOL000569	CA5B
MOL000569	CA13
MOL000569	CA4
MOL000569	TDP1
MOL000569	MAPT
MOL007050	ACHE
MOL007050	ADORA1
MOL007050	ALOX15
MOL007050	ALOX5
MOL007050	AR
MOL007050	BCHE
MOL007050	CCNA2
MOL007050	CDK2
MOL007050	CNR1
MOL007050	CNR2
MOL007050	ESR1
MOL007050	ESR2
MOL007050	F2
MOL007050	GSK3B
MOL007050	HSP90AB1
MOL007050	MAPK14
MOL007050	MAPT
MOL007050	MBNL1
MOL007050	MBNL2
MOL007050	MBNL3
MOL007050	NOS2
MOL007050	PDE4A
MOL007050	PDE4B
MOL007050	PDE4C
MOL007050	PDE4D
MOL007050	PIM1
MOL007050	PPARG
MOL007058	AKR1A1
MOL007058	AKR1B1
MOL007058	AKR1B10
MOL007058	AKR1B15
MOL007058	AKR1E2
MOL007058	AR
MOL007058	DPP4
MOL007058	DYRK1A
MOL007058	F2
MOL007058	MAPT
MOL007058	MBNL1
MOL007058	MBNL2
MOL007058	MBNL3
MOL007058	MPI
MOL007058	NCOA1
MOL007058	PDE4A
MOL007058	PIK3CG
MOL007058	PTGS2
MOL007058	PTPRC
MOL007058	RXRA
MOL007058	TDP1
MOL007058	TERT
MOL007064	PTGS2
MOL007064	PGR
MOL007064	NR3C2
MOL007064	NR3C1
MOL007064	NCOA2
MOL007064	NCOA1
MOL007068	ADK
MOL007068	ALPI
MOL007068	ALPL
MOL007068	ALPP
MOL007068	ALPPL2
MOL007068	DPP4
MOL007068	EGFR
MOL007068	ERBB2
MOL007068	F2
MOL007068	HSP90AB1
MOL007068	IGHG1
MOL007068	MAPK10
MOL007068	MAPK11
MOL007068	MAPK14
MOL007068	MAPK8
MOL007068	MAPK9
MOL007068	MAPT
MOL007068	NCOA1
MOL007068	PIK3CG
MOL007068	PRSS1
MOL007068	PTGS2
MOL007068	RXRA
MOL007068	UPP1
MOL007068	UPP2
MOL007069	PTGS1
MOL007069	DRD1
MOL007069	CHRM3
MOL007069	F2
MOL007069	CHRM1
MOL007069	SCN5A
MOL007069	CHRM5
MOL007069	PTGS2
MOL007069	CA2
MOL007069	CHRM4
MOL007069	OPRD1
MOL007069	ACHE
MOL007069	ADRA1A
MOL007069	CHRM2
MOL007069	ADRB2
MOL007069	OPRM1
MOL007069	GABRA1
MOL007069	DPP4
MOL007069	HSP90AB1
MOL007069	PIK3CG
MOL007069	CHRNA7
MOL007069	NCOA1
MOL007079	DRD1
MOL007079	F2
MOL007079	CHRM1
MOL007079	PTGS2
MOL007079	OPRD1
MOL007079	ACHE
MOL007079	HTR2A
MOL007079	ADRB2
MOL007079	OPRM1
MOL007079	DPP4
MOL007079	CHRNA7
MOL007079	PRSS1
MOL007079	NCOA1
MOL007081	AZU1
MOL007081	CA2
MOL007081	ELANE
MOL007081	HSP90AB1
MOL007081	KDM4A
MOL007081	KDM4B
MOL007081	KDM4C
MOL007081	MAPT
MOL007081	MBNL1
MOL007081	MBNL2
MOL007081	MBNL3
MOL007081	NCOA1
MOL007081	NR3C1
MOL007081	OPRM1
MOL007081	PGR
MOL007081	PRTN3
MOL007081	PTGS2
MOL007081	STAT1
MOL007081	STAT2
MOL007081	STAT3
MOL007081	STAT4
MOL007081	TDP1
MOL007081	TOP2A
MOL007082	MAPT
MOL007082	KDM4A
MOL007082	KDM4B
MOL007082	KDM4C
MOL007082	ELANE
MOL007082	AZU1
MOL007082	PRTN3
MOL007082	MBNL1
MOL007082	MBNL2
MOL007082	MBNL3
MOL007082	TDP1
MOL007082	SLC6A2
MOL007082	SLC6A4
MOL007082	SLC6A3
MOL007082	SLC6A9
MOL007082	PTGS1
MOL007082	KCNH2
MOL007082	SCN5A
MOL007082	F10
MOL007082	PTGS2
MOL007082	RXRA
MOL007082	PIK3CG
MOL007082	NCOA1
MOL007082	KCNMA1
MOL007088	ADRA1A
MOL007088	ADRA1B
MOL007088	ADRA1D
MOL007088	ADRB2
MOL007088	APP
MOL007088	AZU1
MOL007088	BCHE
MOL007088	BCL2L1
MOL007088	BIRC5
MOL007088	CCND1
MOL007088	CHRM1
MOL007088	CHRM2
MOL007088	CHRM3
MOL007088	CHRM4
MOL007088	CHRM5
MOL007088	CHRNA7
MOL007088	DRD1
MOL007088	DYRK1A
MOL007088	EDN1
MOL007088	ELANE
MOL007088	GABRA1
MOL007088	MAPT
MOL007088	MBNL1
MOL007088	MBNL2
MOL007088	MBNL3
MOL007088	NCOA1
MOL007088	NCOA2
MOL007088	OPRD1
MOL007088	OPRM1
MOL007088	PGR
MOL007088	PRTN3
MOL007088	PTGS1
MOL007088	PTGS2
MOL007088	RELA
MOL007088	SCN5A
MOL007088	STAT1
MOL007088	STAT2
MOL007088	STAT3
MOL007088	TOP2B
MOL007088	STAT4
MOL007088	TNF
MOL007088	TOP2A
MOL007094	PTGS1
MOL007094	DRD1
MOL007094	CHRM3
MOL007094	F2
MOL007094	CHRM1
MOL007094	ESR1
MOL007094	SCN5A
MOL007094	CHRM5
MOL007094	PTGS2
MOL007094	CA2
MOL007094	CHRM4
MOL007094	RXRA
MOL007094	ACHE
MOL007094	ADRA1A
MOL007094	CHRM2
MOL007094	ADRA1B
MOL007094	ADRB2
MOL007094	ADRA1D
MOL007094	CHRNA2
MOL007094	SLC6A4
MOL007094	OPRM1
MOL007094	GABRA1
MOL007094	DPP4
MOL007094	HSP90AB1
MOL007094	CHRNA7
MOL007105	PTGS1
MOL007105	DRD1
MOL007105	CHRM3
MOL007105	CHRM1
MOL007105	ESR1
MOL007105	SCN5A
MOL007105	CHRM5
MOL007105	PTGS2
MOL007105	NOS3
MOL007105	CHRM4
MOL007105	RXRA
MOL007105	OPRD1
MOL007105	PDE3A
MOL007105	HTR2A
MOL007105	ADRA1A
MOL007105	CHRM2
MOL007105	ADRA1B
MOL007105	ADRB2
MOL007105	ADRA1D
MOL007105	SLC6A4
MOL007105	OPRM1
MOL007105	GABRA1
MOL007105	HSP90AB1
MOL007105	CDK2
MOL007105	CHRNA7
MOL007105	PIM1
MOL007108	NOS2
MOL007108	PTGS1
MOL007108	DRD1
MOL007108	CHRM3
MOL007108	CHRM1
MOL007108	ESR1
MOL007108	AR
MOL007108	SCN5A
MOL007108	F10
MOL007108	CHRM5
MOL007108	PTGS2
MOL007108	CA2
MOL007108	CHRM4
MOL007108	RXRA
MOL007108	OPRD1
MOL007108	ACHE
MOL007108	ADRA1A
MOL007108	CHRM2
MOL007108	ADRA1B
MOL007108	ADRB2
MOL007108	ADRA1D
MOL007108	TOP2A
MOL007108	DRD2
MOL007108	OPRM1
MOL007108	GABRA1
MOL007108	CDK2
MOL007108	CHRNA7
MOL007108	PRSS1
MOL007108	PIM1
MOL007108	NCOA2
MOL007108	NCOA1
MOL007120	ACHE
MOL007120	AZU1
MOL007120	CA2
MOL007120	DYRK1A
MOL007120	ELANE
MOL007120	F2
MOL007120	IDO1
MOL007120	IDO2
MOL007120	MAPT
MOL007120	MBNL1
MOL007120	MBNL2
MOL007120	MBNL3
MOL007120	NCOA1
MOL007120	NCOA2
MOL007120	NR3C1
MOL007120	PGR
MOL007120	PRTN3
MOL007120	PTGS2
MOL007120	STAT1
MOL007120	STAT2
MOL007120	STAT3
MOL007120	STAT4
MOL007120	TDP1
MOL007125	ACHE
MOL007125	ADRA1B
MOL007125	ADRA1D
MOL007125	ADRB2
MOL007125	BCHE
MOL007125	CA2
MOL007125	CDC25A
MOL007125	CDC25B
MOL007125	CES1
MOL007125	CHRM1
MOL007125	CHRM3
MOL007125	CHRNA7
MOL007125	DYRK1A
MOL007125	IGHG1
MOL007125	MAPT
MOL007125	MBNL1
MOL007125	MBNL2
MOL007125	MBNL3
MOL007125	NCOA1
MOL007125	NCOA2
MOL007125	OPRM1
MOL007125	PPARG
MOL007125	PTGS1
MOL007125	PTGS2
MOL007125	PTPN1
MOL007125	PTPN2
MOL007125	SCN5A
MOL007125	TDP1
MOL007125	TOP1
MOL007125	TOP1MT
MOL007125	TOP2A
MOL007130	NOS2
MOL007130	PTGS1
MOL007130	F2
MOL007130	ESR1
MOL007130	AR
MOL007130	PTGS2
MOL007130	PTPN1
MOL007130	HSP90AB1
MOL007130	PRSS1
MOL007130	CALM1
MOL007132	AKR1A1
MOL007132	AKR1B1
MOL007132	AKR1B10
MOL007132	AKR1B15
MOL007132	AKR1E2
MOL007132	AR
MOL007132	CCNA2
MOL007132	DPP4
MOL007132	ESR1
MOL007132	F2
MOL007132	FGR
MOL007132	FRK
MOL007132	FYN
MOL007132	MMP1
MOL007132	MMP2
MOL007132	MMP3
MOL007132	MMP9
MOL007132	PPARG
MOL007132	PRSS1
MOL007132	PTGS2
MOL007132	SRC
MOL007132	TDP1
MOL007132	YES1
MOL007140	TDP1
MOL007140	CA1
MOL007140	CA2
MOL007140	CA3
MOL007140	CA5A
MOL007140	CA7
MOL007140	CA13
MOL007140	CA5B
MOL007140	PTPN1
MOL007140	PTPN2
MOL007140	PTPN2
MOL007140	CA12
MOL007140	CA9
MOL007140	CA14
MOL007140	CA4
MOL007140	AKR1B10
MOL007150	ACHE
MOL007150	AKR1A1
MOL007150	AKR1B1
MOL007150	AKR1B10
MOL007150	AKR1B15
MOL007150	AKR1E2
MOL007150	CA2
MOL007150	DPP4
MOL007150	F2
MOL007150	HSP90AB1
MOL007150	HTR2A
MOL007150	MAPT
MOL007150	MPI
MOL007150	NCOA1
MOL007150	PDE4A
MOL007150	PDE4B
MOL007150	PDE4C
MOL007150	PDE4D
MOL007150	PRSS1
MOL007150	PTGS2
MOL007150	PTPRC
MOL007150	TDP1
MOL007150	TERT
MOL007155	ACHE
MOL007155	ADRA1A
MOL007155	ADRB2
MOL007155	AKR1A1
MOL007155	AKR1B1
MOL007155	AKR1B10
MOL007155	AKR1B15
MOL007155	AKR1E2
MOL007155	CHRM1
MOL007155	CHRNA7
MOL007155	DPP4
MOL007155	F2
MOL007155	MAPT
MOL007155	MPI
MOL007155	NCOA1
MOL007155	OPRD1
MOL007155	OPRM1
MOL007155	PDE4A
MOL007155	PDE4B
MOL007155	PIK3CA
MOL007155	PIK3CB
MOL007155	PIK3CD
MOL007155	PRSS1
MOL007155	PTGS2
MOL007155	PTPRC
MOL007155	SCN5A
MOL007155	TDP1
MOL007155	TERT
