# Supplementary material for: Exploring the Mechanism of Danshen against Myelofibrosis by Network Pharmacology and Molecular Docking
Source: Evid Based Complement Alternat Med. 2018 Dec 5;2018:8363295. doi: 10.1155/2018/8363295 (PMC6304517; doi:10.1155/2018/8363295)
Supplement: Supplementary Materials — Supplementary Table 1: the information of compositive compounds of Danshen. Supplementary Table 2: prediction of putative targets for compositive compounds Danshen. Supplementary Table 3: overlap of significantly targets in myelofibrosis. Supplementary Table 4: the results of topology analysis. Supplementary Table 5: re-fishing targets based on Closeness and Betweenness. Supplementary Table 6: the results of KEGG enrichment analysis. Supplementary Table 7: detailed information on molecular docking of compounds. [file 8363295.f1.zip › Supplementary Table S3-Overlap of significantly targets in Myelofibrosis.xlsx]

## Sheet: Sheet1
Supplementary Table S3: Overlap of significantly targets in Myelofibrosis
Gene Symbol
ASXL1
AURKA
BMP1
BMP6
BMP7
CALR
CD14
CD177
CD34
CD9
CDKN2B-AS1
CEACAM6
CEACAM8
CHI3L1
CRP
CTNNB1
CXCL12
CXCL8
CXCR1
CXCR2
CXCR4
DNMT3A
ENG
ERCC2
ETV6
EZH2
FKBP5
GATA1
GDF15
HDAC11
HDAC9
HEMGN
HMGA2
HMGXB4
IDH1
IDH2
IL15
IL17A
IL1B
IL2RA
ITGB2
JAK2
KIT
KRT7
LCN2
LDHA
LDHB
LOX
LOXL1
LOXL2
LTBP1
LYN
MCAM
MED23
MEG3
MIR494
MMP13
MMP14
MMP8
MMP9
MPIG6B
MPL
MPO
MS4A3
MTHFR
MTOR
NAMPT
NFE2
NFE2L2
NGFR
NOG
NOL3
NPM1
NR3C1
ORAI1
ORAI2
ORAI3
PAOX
PDGFB
PHF20
PML
PRG2
PROM1
PTH
RARB
RUNX1
SELP
SH2B3
SLCO2A1
SOCS3
SOCS6
SRC
SRSF2
STAT3
STAT5A
STIM1
STIM2
TAC1
TEK
TET2
TGFB1
THBS1
TIMP1
TNF
TNFRSF11B
TP53
TPO
TRPC1
TRPC4
U2AF1
VEGFA
WT1
WT1-AS
ZFPM1
