# Supplementary material for: Exploring the Mechanism of Danshen against Myelofibrosis by Network Pharmacology and Molecular Docking
Source: Evid Based Complement Alternat Med. 2018 Dec 5;2018:8363295. doi: 10.1155/2018/8363295 (PMC6304517; doi:10.1155/2018/8363295)
Supplement: Supplementary Materials — Supplementary Table 1: the information of compositive compounds of Danshen. Supplementary Table 2: prediction of putative targets for compositive compounds Danshen. Supplementary Table 3: overlap of significantly targets in myelofibrosis. Supplementary Table 4: the results of topology analysis. Supplementary Table 5: re-fishing targets based on Closeness and Betweenness. Supplementary Table 6: the results of KEGG enrichment analysis. Supplementary Table 7: detailed information on molecular docking of compounds. [file 8363295.f1.zip › Supplementary Table S4-The results of topology analysis.xlsx]

## Sheet: Sheet1
Supplementary Table S4: The results of topology analysis
Gene Name	Degree Undir
TP53	116
SRC	100
TNF	100
VEGFA	99
PIK3CA	93
IL8	90
EGFR	84
STAT3	83
PIK3CG	82
PIK3CD	80
PIK3CB	79
PTGS2	76
ESR1	74
TGFB1	73
CXCL12	69
CCND1	69
JAK2	69
CTNNB1	67
MMP9	66
CALM1	66
