# Supplementary material for: Exploring the Mechanism of Danshen against Myelofibrosis by Network Pharmacology and Molecular Docking
Source: Evid Based Complement Alternat Med. 2018 Dec 5;2018:8363295. doi: 10.1155/2018/8363295 (PMC6304517; doi:10.1155/2018/8363295)
Supplement: Supplementary Materials — Supplementary Table 1: the information of compositive compounds of Danshen. Supplementary Table 2: prediction of putative targets for compositive compounds Danshen. Supplementary Table 3: overlap of significantly targets in myelofibrosis. Supplementary Table 4: the results of topology analysis. Supplementary Table 5: re-fishing targets based on Closeness and Betweenness. Supplementary Table 6: the results of KEGG enrichment analysis. Supplementary Table 7: detailed information on molecular docking of compounds. [file 8363295.f1.zip › Supplementary Table S5-Re-fishing targets based on Closeness and Betweenness(1).xlsx]

## Sheet: Sheet1
Supplementary Table S5: Re-fishing targets based on Closeness and Betweenness
Gene Name	Closeness Undir	Betweenness Undir
TP53	0.00277778	5624.23
SRC	0.0026738	3293.43
TNF	0.00263158	2667.78
VEGFA	0.00265252	3095.1
PIK3CA	0.0025974	1879.07
IL8	0.00255754	2044.24
EGFR	0.00253807	1199.1
STAT3	0.00251256	1276.84
PIK3CG	0.00251256	776.762
PIK3CD	0.00249377	600.49
PIK3CB	0.00248756	556.896
PTGS2	0.00246305	1136.26
ESR1	0.00246914	1150.57
TGFB1	0.00240964	1276.01
CXCL12	0.00236967	937.712
CCND1	0.00244499	1571.77
JAK2	0.00243902	2002.1
CTNNB1	0.00242131	2059.53
MMP9	0.00240385	3094.35
CALM1	0.00235849	520.813
Note: The red score represents the top ten in its queue.
