# Supplementary material for: Exploring the Mechanism of Danshen against Myelofibrosis by Network Pharmacology and Molecular Docking
Source: Evid Based Complement Alternat Med. 2018 Dec 5;2018:8363295. doi: 10.1155/2018/8363295 (PMC6304517; doi:10.1155/2018/8363295)
Supplement: Supplementary Materials — Supplementary Table 1: the information of compositive compounds of Danshen. Supplementary Table 2: prediction of putative targets for compositive compounds Danshen. Supplementary Table 3: overlap of significantly targets in myelofibrosis. Supplementary Table 4: the results of topology analysis. Supplementary Table 5: re-fishing targets based on Closeness and Betweenness. Supplementary Table 6: the results of KEGG enrichment analysis. Supplementary Table 7: detailed information on molecular docking of compounds. [file 8363295.f1.zip › Supplementary Table S6-The results of KEGG enrichment analysis.xlsx]

## Sheet: Sheet1
Supplementary Table S5:Detailed information on molecular docking of compounds	Supplementary Table S6: The results of KEGG enrichment analysis.
ID	Description	PValue	Count	Genes
hsa04060	Cytokine-cytokine receptor interaction	1.22e-09	18	TNF, IL2RA, PDGFB, CXCR1, CXCR2, KIT, IL15, CXCL12, TGFB1, IL17A, TNFRSF11B, CXCR4, VEGFA, IL1B, TPO, NGFR, MPL, BMP7
hsa05200	Pathways in cancer	0.000179	13	PDGFB, STAT5A, MMP9, TP53, PML, KIT, STAT3, TGFB1, CTNNB1, VEGFA, RARB, MTOR, RUNX1
hsa04640	Hematopoietic cell lineage	3.67e-05	8	CD9, TNF, IL2RA, CD34, IL1B, TPO, KIT, CD14
hsa04630	Jak-STAT signaling pathway	0.00141158	8	IL2RA, SOCS3, STAT5A, TPO, JAK2, IL15, MPL, STAT3
hsa04350	TGF-beta signaling pathway	0.000345	7	NOG, LTBP1, TNF, BMP7, THBS1, TGFB1, BMP6
hsa04062	Chemokine signaling pathway	0.0160921	7	LYN, CXCR4, CXCR1, JAK2, CXCR2, CXCL12, STAT3
hsa05221	Acute myeloid leukemia	0.000397	6	STAT5A, PML, MTOR, KIT, RUNX1, STAT3
hsa04920	Adipocytokine signaling pathway	0.00604676	5	TNF, SOCS3, JAK2, MTOR, STAT3
hsa04670	Leukocyte transendothelial migration	0.0401319	5	CXCR4, MMP9, ITGB2, CXCL12, CTNNB1
hsa05219	Bladder cancer	0.0107212	4	MMP9, VEGFA, TP53, THBS1
hsa04672	Intestinal immune network for IgA production	0.0163009	4	CXCR4, IL15, CXCL12, TGFB1
hsa05120	Epithelial cell signaling in Helicobacter pylori infection	0.0383226	4	LYN, CXCR1, CXCR2, SRC
hsa05212	Pancreatic cancer	0.0442333	4	VEGFA, TP53, STAT3, TGFB1
hsa05220	Chronic myeloid leukemia	0.0489489	4	STAT5A, TP53, RUNX1, TGFB1
hsa04144	Endocytosis	0.0507003	6	IL2RA, CXCR4, CXCR1, CXCR2, KIT, SRC
hsa00270	Cysteine and methionine metabolism	0.053384	3	DNMT3A, LDHB, LDHA
hsa05215	Prostate cancer	0.0740208	4	PDGFB, TP53, MTOR, CTNNB1
hsa04930	Type II diabetes mellitus	0.0940453	3	TNF, SOCS3, MTOR
