# Supplementary material for: Exploring the Mechanism of Danshen against Myelofibrosis by Network Pharmacology and Molecular Docking
Source: Evid Based Complement Alternat Med. 2018 Dec 5;2018:8363295. doi: 10.1155/2018/8363295 (PMC6304517; doi:10.1155/2018/8363295)
Supplement: Supplementary Materials — Supplementary Table 1: the information of compositive compounds of Danshen. Supplementary Table 2: prediction of putative targets for compositive compounds Danshen. Supplementary Table 3: overlap of significantly targets in myelofibrosis. Supplementary Table 4: the results of topology analysis. Supplementary Table 5: re-fishing targets based on Closeness and Betweenness. Supplementary Table 6: the results of KEGG enrichment analysis. Supplementary Table 7: detailed information on molecular docking of compounds. [file 8363295.f1.zip › Supplementary Table S7-Detailed information on molecular docking of compounds.xlsx]

## Sheet: Sheet1
Supplementary Table S7:Detailed information on molecular docking of compounds.
Mol ID	Mol Name	TP53（3D06）	VEGFA(4KZN)	STAT3(4ZIA)	JAK2(3UGC)	TNF(1VYR)
MOL000569	digallate	4.276	2.99	3.546	4.322	3.819
MOL007050	2-(4-hydroxy-3-methoxyphenyl)-5-(3-hydroxypropyl)-7-methoxy-3-benzofurancarboxaldehyde	6.799	3.934	4.067	5.146	4.603
MOL007058	formyltanshinone	5.695	7.122	6.498	6.205	6.296
MOL007064	przewalskin b	6.474	4.782	4.487	7.062	7.054
MOL007068	Przewaquinone B	6.687	7.45	6.376	6.382	6.124
MOL007069	przewaquinone c	6.398	7.748	6.537	6.48	6.228
MOL007079	tanshinaldehyde	6.622	7.266	6.54	6.336	6.394
MOL007081	Danshenol B	5.983	6.712	6.108	6.692	6.709
MOL007082	Danshenol A	4.917	4.496	3.528	4.979	5.243
MOL007088	cryptotanshinone	6.539	8.08	6.657	6.481	6.59
MOL007094	danshenspiroketallactone	6.651	5.959	5.862	6.56	6.199
MOL007105	epidanshenspiroketallactone	6.413	6.546	5.94	6.411	6.589
MOL007108	isocryptotanshi-none	6.74	7.755	6.632	6.456	6.489
MOL007120	miltionone Ⅱ	5.422	7.485	6.866	6.506	6.637
MOL007125	neocryptotanshinone	5.43	3.983	4.487	5.629	5.398
MOL007130	prolithospermic acid	3.329	2.616	2.9	4.445	3.843
MOL007132	(2R)-3-(3,4-dihydroxyphenyl)-2-[(Z)-3-(3,4-dihydroxyphenyl)acryloyl]oxy-propionic acid	5.019	7.662	6.673	5.217	5.489
MOL007140	(Z)-3-[2-[(E)-2-(3,4-dihydroxyphenyl)vinyl]-3,4-dihydroxy-phenyl]acrylic acid	3.908	2.877	3.197	4.628	3.969
MOL007150	Tanshindiol A	6.394	6.56	6.421	6.448	6.474
MOL007155	Tanshinone IIb	6.64	7.753	6.467	6.472	6.37
